# Supplementary material
Source: MDPI journal article supplement (https://www.mdpi.com/1996-1073/14/22/7670)
Supplement: s1 [file s1]

# Comparative Study on Quality of Fuel Pellets from Switchgrass Treated with Different White-Rot Fungi

Onu Onu Olughu<sup>1\*</sup>, Lope G. Tabil<sup>1\*</sup>, Tim Dumonceaux<sup>2</sup>, Edmund Mupondwa<sup>2</sup>, Duncan Cree<sup>3</sup>

<sup>1</sup>Department of Chemical and Biological Engineering, University of Saskatchewan, 57 Campus Drive, Saskatoon, SK S7N 5A9, Canada

<sup>2</sup>Agriculture and Agri-Food Canada, Saskatoon Research Centre, 107 Science Place, Saskatoon, SK S7N 0X2, Canada

<sup>3</sup>Department of Mechanical Engineering, University of Saskatchewan, 57 Campus Drive, Saskatoon, SK S7N 5A9, Canada

\*Corresponding authors. E-mail: lope.tabil@usask.ca, ono604@usask.ca

## SUPPLEMENTARY DATA

Table S1. Actual and coded factor values of the independent variables in the fungal pretreatment.

| Code  | Actual Value                 |                                      |                                    |                                     |
|-------|------------------------------|--------------------------------------|------------------------------------|-------------------------------------|
| $z_j$ | Fermentation time, $x_1$ (d) | Fermentation temperature, $x_2$ (°C) | Inoculum concentration, $x_3$ (mL) | Hammer mill screen size, $x_4$ (mm) |
| 1     | 35                           | 34                                   | 15                                 | 6.4                                 |
| 0     | 28                           | 28                                   | 10                                 | 3.2                                 |
| -1    | 21                           | 22                                   | 5                                  | 1.6                                 |

Table S2. Physical and mechanical properties of the fungal-treated switchgrass pellets.

| Run | Fermentation temperature<br>(°C) | Fermentation time<br>(d) | Inoculum concentration<br>(mL) | Hammer Mill Screen size<br>(mm) | <i>T. versicolor</i> 52J (TV52J)            |                           |                              | <i>T. versicolor</i> m4D (m4D)              |                           |                              | <i>Phanerochaete chrysosporium</i> (PC)     |                           |                              |
|-----|----------------------------------|--------------------------|--------------------------------|---------------------------------|---------------------------------------------|---------------------------|------------------------------|---------------------------------------------|---------------------------|------------------------------|---------------------------------------------|---------------------------|------------------------------|
|     |                                  |                          |                                |                                 | Pellet unit density<br>(kg/m <sup>3</sup> ) | Tensile strength<br>(MPa) | Dimensional stability<br>(%) | Pellet unit density<br>(kg/m <sup>3</sup> ) | Tensile strength<br>(MPa) | Dimensional stability<br>(%) | Pellet unit density<br>(kg/m <sup>3</sup> ) | Tensile strength<br>(MPa) | Dimensional stability<br>(%) |
| 1   | 28.0                             | 35.0                     | 5.0                            | 4.0                             | 1154.99                                     | 1.414                     | 0.080                        | 1161.49                                     | 0.988                     | 0.09                         | 1096.02                                     | 2.073                     | 1.43                         |
| 2   | 34.0                             | 28.0                     | 10.0                           | 6.4                             | 1176.34                                     | 1.54                      | 0.360                        | 1168.08                                     | 1.410                     | 0.04                         | 1142.95                                     | 2.300                     | 0.73                         |
| 3   | 34.0                             | 28.0                     | 15.0                           | 4.0                             | 1148.25                                     | 1.53                      | 0.320                        | 1160.78                                     | 1.745                     | 0.28                         | 1170.75                                     | 1.766                     | -0.14                        |
| 4   | 28.0                             | 28.0                     | 5.0                            | 1.6                             | 1142.13                                     | 1.429                     | 0.130                        | 1143.89                                     | 1.410                     | -0.01                        | 1155.32                                     | 1.048                     | 0.21                         |
| 5   | 34.0                             | 28.0                     | 5.0                            | 4.0                             | 1169.56                                     | 1.611                     | 0.210                        | 1165.70                                     | 1.291                     | 0.40                         | 1138.91                                     | 1.502                     | 0.81                         |
| 6   | 34.0                             | 21.0                     | 10.0                           | 4.0                             | 1142.94                                     | 1.312                     | -0.160                       | 1136.00                                     | 1.370                     | 1.08                         | 1155.70                                     | 1.424                     | -0.53                        |
| 7   | 28.0                             | 28.0                     | 10.0                           | 4.0                             | 1111.67                                     | 1.438                     | 0.850                        | 1151.08                                     | 0.909                     | 0.51                         | 1056.73                                     | 1.780                     | 2.02                         |
| 8   | 28.0                             | 21.0                     | 5.0                            | 4.0                             | 1124.51                                     | 0.943                     | 0.700                        | 1125.85                                     | 1.290                     | 0.32                         | 1130.42                                     | 1.340                     | 0.30                         |
| 9   | 22.0                             | 35.0                     | 10.0                           | 4.0                             | 1142.82                                     | 1.409                     | 0.190                        | 1126.92                                     | 1.210                     | -0.22                        | 1135.10                                     | 1.766                     | 0.61                         |
| 10  | 28.0                             | 35.0                     | 15.0                           | 4.0                             | 1160.09                                     | 2.069                     | 0.380                        | 1132.73                                     | 1.409                     | 0.34                         | 1079.18                                     | 1.328                     | -1.32                        |
| 11  | 28.0                             | 21.0                     | 15.0                           | 4.0                             | 1146.29                                     | 1.353                     | 0.550                        | 1132.09                                     | 0.937                     | 0.31                         | 1154.66                                     | 1.590                     | -0.49                        |
| 12  | 28.0                             | 21.0                     | 10.0                           | 1.6                             | 1130.70                                     | 1.187                     | 0.040                        | 1138.01                                     | 1.041                     | 0.08                         | 1157.39                                     | 0.916                     | -0.26                        |
| 13  | 28.0                             | 28.0                     | 15.0                           | 1.6                             | 1175.80                                     | 0.879                     | 0.230                        | 1131.10                                     | 1.375                     | -0.03                        | 1133.33                                     | 1.369                     | 0.71                         |
| 14  | 28.0                             | 28.0                     | 10.0                           | 4.0                             | 1143.03                                     | 1.605                     | 0.230                        | 1147.10                                     | 1.339                     | -0.01                        | 1061.32                                     | 1.816                     | 1.46                         |
| 15  | 22.0                             | 28.0                     | 15.0                           | 4.0                             | 1139.78                                     | 1.606                     | 0.280                        | 1142.69                                     | 1.145                     | -0.42                        | 1117.71                                     | 1.485                     | -0.65                        |
| 16  | 22.0                             | 28.0                     | 5.0                            | 4.0                             | 1128.81                                     | 0.925                     | 0.280                        | 1115.04                                     | 0.866                     | 0.16                         | 1025.11                                     | 1.190                     | 0.23                         |
| 17  | 28.0                             | 28.0                     | 10.0                           | 4.0                             | 1151.28                                     | 1.297                     | 0.420                        | 1146.68                                     | 1.359                     | 0.03                         | 1171.25                                     | 1.356                     | 0.06                         |
| 18  | 28.0                             | 35.0                     | 10.0                           | 1.6                             | 1158.08                                     | 1.783                     | 0.080                        | 1143.77                                     | 1.306                     | -0.02                        | 1040.85                                     | 1.290                     | -1.72                        |
| 19  | 28.0                             | 28.0                     | 5.0                            | 6.4                             | 1173.53                                     | 1.283                     | 0.370                        | 1127.54                                     | 1.359                     | 0.54                         | 1135.61                                     | 1.374                     | 1.26                         |
| 20  | 22.0                             | 21.0                     | 10.0                           | 4.0                             | 1127.00                                     | 1.201                     | 0.220                        | 1122.41                                     | 1.156                     | 0.51                         | 1134.94                                     | 1.403                     | 0.20                         |
| 21  | 28.0                             | 35.0                     | 10.0                           | 6.4                             | 1159.57                                     | 1.587                     | 0.250                        | 1163.66                                     | 1.353                     | 0.59                         | 1170.22                                     | 1.390                     | -0.35                        |
| 22  | 22.0                             | 28.0                     | 10.0                           | 6.4                             | 1144.36                                     | 1.019                     | 0.200                        | 1143.92                                     | 0.963                     | 0.07                         | 981.93                                      | 0.805                     | 2.87                         |
| 23  | 28.0                             | 21.0                     | 10.0                           | 6.4                             | 1145.40                                     | 0.896                     | 0.020                        | 1132.62                                     | 1.129                     | 0.26                         | 1140.28                                     | 1.239                     | 0.34                         |
| 24  | 28.0                             | 28.0                     | 10.0                           | 4.0                             | 1143.19                                     | 1.211                     | 0.150                        | 1136.55                                     | 1.224                     | 0.62                         | 1144.86                                     | 1.375                     | 1.01                         |
| 25  | 34.0                             | 28.0                     | 10.0                           | 1.6                             | 1160.89                                     | 1.194                     | 0.040                        | 1161.82                                     | 1.088                     | 0.36                         | 1164.19                                     | 1.810                     | 0.43                         |
| 26  | 28.0                             | 28.0                     | 10.0                           | 4.0                             | 1159.99                                     | 1.412                     | 0.690                        | 1149.13                                     | 1.030                     | 0.54                         | 1143.89                                     | 1.476                     | 1.20                         |
| 27  | 28.0                             | 28.0                     | 15.0                           | 6.4                             | 1143.08                                     | 1.569                     | -0.290                       | 1152.45                                     | 1.321                     | 0.17                         | 1150.50                                     | 1.490                     | 0.29                         |
| 28  | 34.0                             | 35.0                     | 10.0                           | 4.0                             | 1159.99                                     | 1.484                     | 1.110                        | 1155.55                                     | 1.704                     | 0.07                         | 1161.51                                     | 2.011                     | 0.74                         |
| 29  | 22.0                             | 28.0                     | 10.0                           | 1.6                             | 1148.12                                     | 1.109                     | 0.140                        | 1141.28                                     | 1.020                     | 0.38                         | 1021.26                                     | 1.103                     | 1.32                         |

Table S3. Optimum conditions for producing switchgrass pellets pretreated by the fungal strains used in this study under solid-state fermentation.

| Fungal strains | Fermentation time (d) | Fermentation temperature (°C) | Inoculum concentration (mL) | Hammer mill screen size (mm) | Pellet tensile strength (MPa) | Pellet unit density (kg/m <sup>3</sup> ) | Dimensional stability (%) |
|----------------|-----------------------|-------------------------------|-----------------------------|------------------------------|-------------------------------|------------------------------------------|---------------------------|
| Untreated      | —                     | —                             | 0                           | 3.2                          | 0.751                         | 1068.76                                  | 2.03                      |
| m4D            | 35.0                  | 34.0                          | 15.0                        | 6.1                          | 1.761                         | 1157.22                                  | 0.246                     |
|                | 30.0                  | 34.0                          | 13.2                        | 6.4                          | 1.539                         | 1165.46                                  | 0.335                     |
| TV52J          | 35.0                  | 23.3                          | 15.0                        | 6.4                          | 2.001                         | 1150.57                                  | 0.290                     |
|                | 30.0                  | 34.0                          | 8.6                         | 6.4                          | 1.523                         | 1176.35                                  | 0.359                     |
| PC             | 35.0                  | 34.0                          | 5.0                         | 6.4                          | 2.252                         | 1187.44                                  | 0.428                     |
|                | 21.0                  | 34.0                          | 15.0                        | 4.9                          | 2.029                         | 1164.56                                  | 0.754                     |

m4D: *T. versicolor* m4D; PC: *P. chrysosporium*; TV52J: *T. versicolor* 52J.

Table S4. Elemental composition of untreated and fungal-treated switchgrass.

| Sample Treatment | Ultimate Analysis (%) |             |             |              |              |       |      |
|------------------|-----------------------|-------------|-------------|--------------|--------------|-------|------|
|                  | C                     | H           | N           | S            | O            | H/C   | O/C  |
| Untreated        | 48.43 ± 0.29          | 6.01 ± 0.05 | 0.17 ± 0.06 | 0.05 ± 0.03  | 45.33 ± 0.28 | 0.124 | 0.94 |
| m4D T1           | 47.61 ± 0.34          | 5.86 ± 0.03 | 0.25 ± 0.16 | 0.07 ± 0.05  | 46.21 ± 0.32 | 0.123 | 0.97 |
| m4D P1           | 44.95 ± 1.83          | 5.54 ± 0.23 | 0.19 ± 0.25 | 0.02 ± 0.03  | 49.3 ± 2.18  | 0.123 | 1.10 |
| PC T1            | 46.26 ± 0.57          | 5.73 ± 0.06 | 0.14 ± 0.03 | 0.03 ± 0.01  | 45.39 ± 0.65 | 0.124 | 0.98 |
| PC P1            | 44.78 ± 1.41          | 5.53 ± 0.18 | 0.17 ± 0.03 | 0.12 ± 0.03  | 49.41 ± 1.54 | 0.123 | 1.10 |
| TV52J T1         | 45.89 ± 0.47          | 5.65 ± 0.06 | 0.21 ± 0.23 | 0.12 ± 0.04  | 48.12 ± 0.51 | 0.123 | 1.05 |
| TV52J P1         | 45.85 ± 0.67          | 5.65 ± 0.08 | 0.22 ± 0.13 | 0.04 ± 0.002 | 48.24 ± 0.67 | 0.123 | 1.05 |

m4D T1 = *T. versicolor* m4D treated switchgrass with the highest pellet tensile strength.

m4D P1 = *T. versicolor* m4D treated switchgrass with the highest pellet unit density.

PC T1 = *P. chrysosporium* treated switchgrass with the highest pellet tensile strength.

PC P1 = *P. chrysosporium* treated switchgrass with the highest pellet unit density.

TV52J T1 = *T. versicolor* 52J treated switchgrass with the highest pellet tensile strength.

TV52J P1 = *T. versicolor* 52J treated switchgrass with the highest pellet unit density.

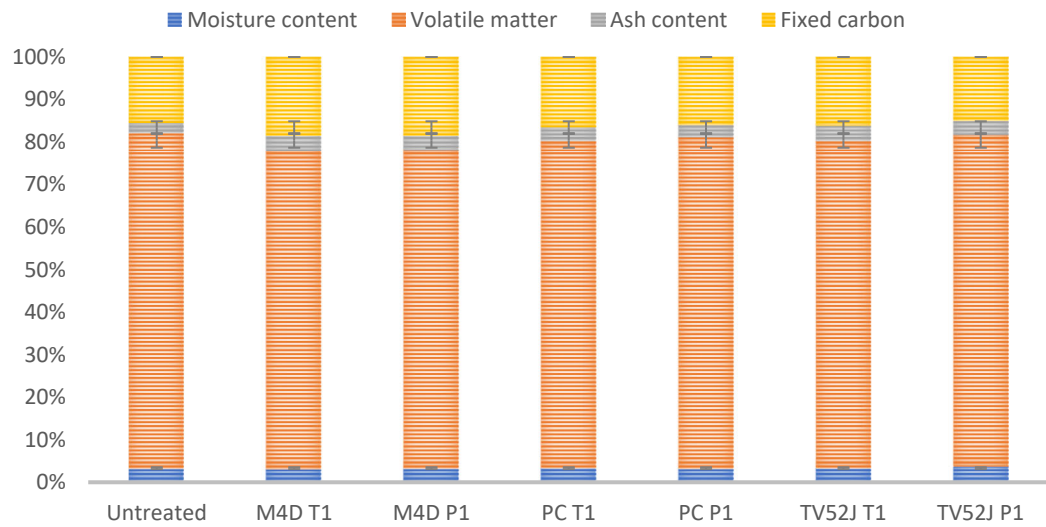

Figure S1. Proximate composition of the untreated and fungal-treated switchgrass. M4D T1 = *T. versicolor* m4D treated switchgrass with the highest pellet tensile strength; m4D P1 = *T. versicolor* m4D treated switchgrass with the highest pellet unit density; PC T1 = *P. chrysosporium* treated switchgrass with the highest pellet tensile strength; PC P1 = *P. chrysosporium* treated switchgrass with the highest pellet unit density; TV52J T1 = *T. versicolor* 52J treated switchgrass with the highest pellet tensile strength; TV52J P1 = *T. versicolor* 52J treated switchgrass with the highest pellet unit density.
